# Supplementary material for: ESIPT-active columnar liquid crystal: organic dyes and quantum dots-assisted fluorescence modulation
Source: Royal Society of Chemistry journal article supplement (doi:10.1039/d4tc01492h), 2024-01-01
Supplement: d4tc01492h1.pdf [file d4tc01492h1.pdf]

**Electronic Supplementary Information (ESI) for: -**

**ESIPT-Active Columnar Liquid Crystal: Organic Dyes and Quantum Dots  
Assisted Fluorescence Modulation**

**Shikha Agarwal<sup>a</sup>, Santosh Y. Khatavi<sup>b</sup>, Bhupendra Pratap Singh<sup>c</sup>, Madhu Babu  
Kanakala<sup>d</sup>, Pralay Kumar Santra<sup>b</sup>, Sandeep Kumar<sup>e,f</sup>, Chi-Yen Huang<sup>g</sup>,  
Channabasaveshwar V. Yelamaggad<sup>b,\*</sup> and Rajiv Manohar<sup>a,\*</sup>**

<sup>a</sup>Liquid Crystal Research Laboratory, Department of Physics, University of Lucknow, Lucknow, Uttar Pradesh-226007, India.

<sup>b</sup>Centre for Nano & Soft Matter Sciences (CeNS), Bengaluru, India.

<sup>c</sup>Department of Electro-Optical Engineering, National United University, No. 2, Lien-Da, Miao-Li city, Miao-Li, 360 Taiwan.

<sup>d</sup>Beckman Coulter Life Sciences, Bengaluru-562149

<sup>e</sup>Raman Research Institute, Bengaluru- 560080 India.

<sup>f</sup>Department of Chemistry, Nitte Meenakshi Institute of Technology (NMIT), Yelahanka, Bengaluru, India.

<sup>g</sup>Graduate Institute of Photonics, National Changhua University of Education, Changhua 500, Taiwan.

\*Corresponding to: **R. Manohar** ([rajiv.manohar@gmail.com](mailto:rajiv.manohar@gmail.com)); **C. V. Yelamaggad** ([yelamaggad@gmail.com](mailto:yelamaggad@gmail.com))

**Figure S1.** 1D intensity vs  $2\theta$  profiles obtained for the  $Col_h/p6mm$  phase of PBSAN-14 as a function of temperature.

**Table S1.** Periodic parameter of host PBSAN-14 at two different temperatures

**Figure S2.** Molecular structure of (a) methyl red dye and (b) rubrene.

**Figure S3.** Room-temperature absorption and photoluminescence emission spectrum of different organic and inorganic dopants used in the study; (a) MRC dye, (b) rubrene, (c) carbon QDs and (d) perovskite QDs.

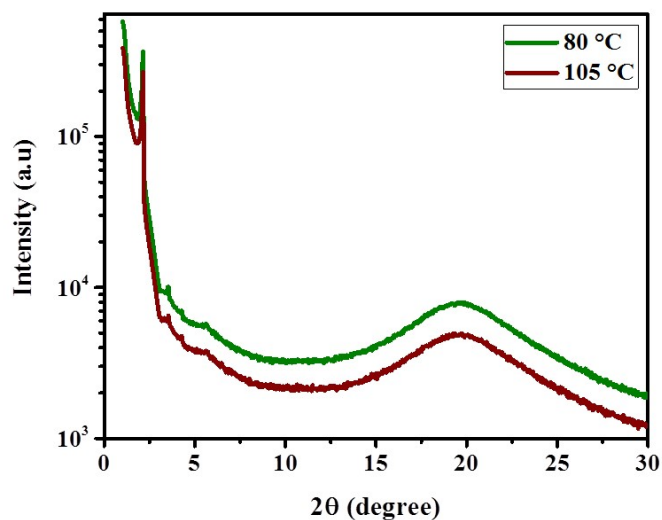

Figure S1: 1D intensity vs  $2\theta$  profiles obtained for the  $\text{Col}_h/\text{p6mm}$  phase of PBSAN-14 as a function of temperature.

Table S1: Periodic parameter of host PBSAN-14 at two different temperatures derived using XRD plot shown above <sup>1</sup>.

| Temperature (°C) | Spacing Observed $d_{obs}$ (Å) | Spacing Calculated $d_{cal}$ (Å) | Miller Indices $hkl$ | Periodic Parameters |
|------------------|--------------------------------|----------------------------------|----------------------|---------------------|
| 80 °C            | 41.03                          | 41.02                            | 100                  | $a = 47.37$         |
|                  | 24.79                          | 23.68                            | 110                  | $S = 1943.20$       |
|                  | 20.56                          | 20.51                            | 200                  | $V = 8647.63$       |
|                  | 15.60                          | 15.52                            | 210                  | $Z = 2.70$          |
| 105 °C           | 41.10                          | 41.09                            | 100                  | $a = 47.45$         |
|                  | 24.20                          | 23.72                            | 110                  | $S = 1949.85$       |
|                  | 20.61                          | 20.54                            | 200                  | $V = 8891.35$       |
|                  | 15.61                          | 15.53                            | 210                  | $Z = 2.73$          |

$a$  - Lattice Parameter (Å);  $S$  - Lattice Area (Å<sup>2</sup>);  $V$  - Molecular Volume (Å<sup>3</sup>);

$Z$  - Number of molecules per column slice

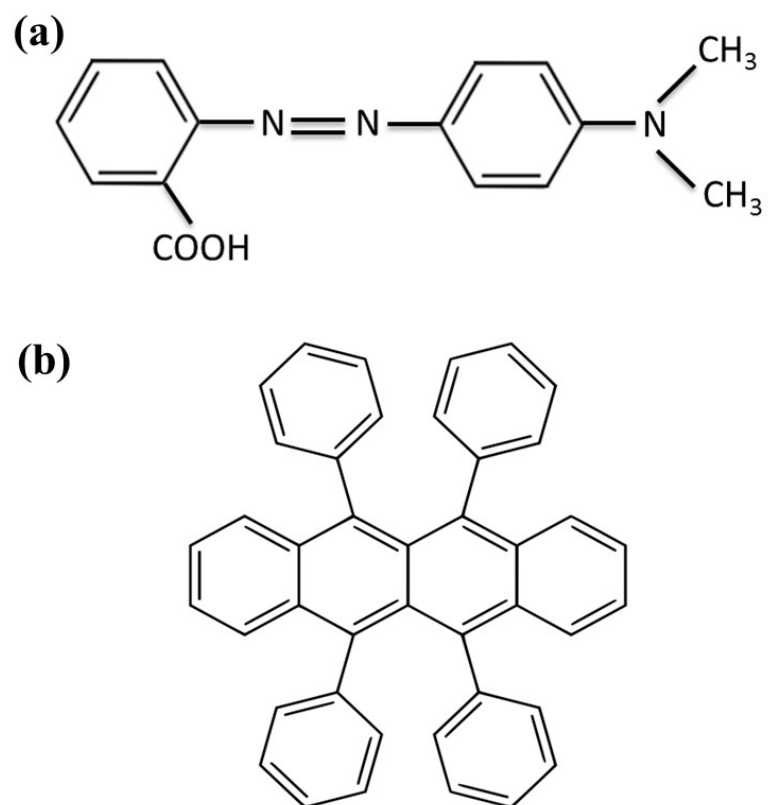

**Figure S2:** Molecular structure of (a) methyl red dye and (b) rubrene.

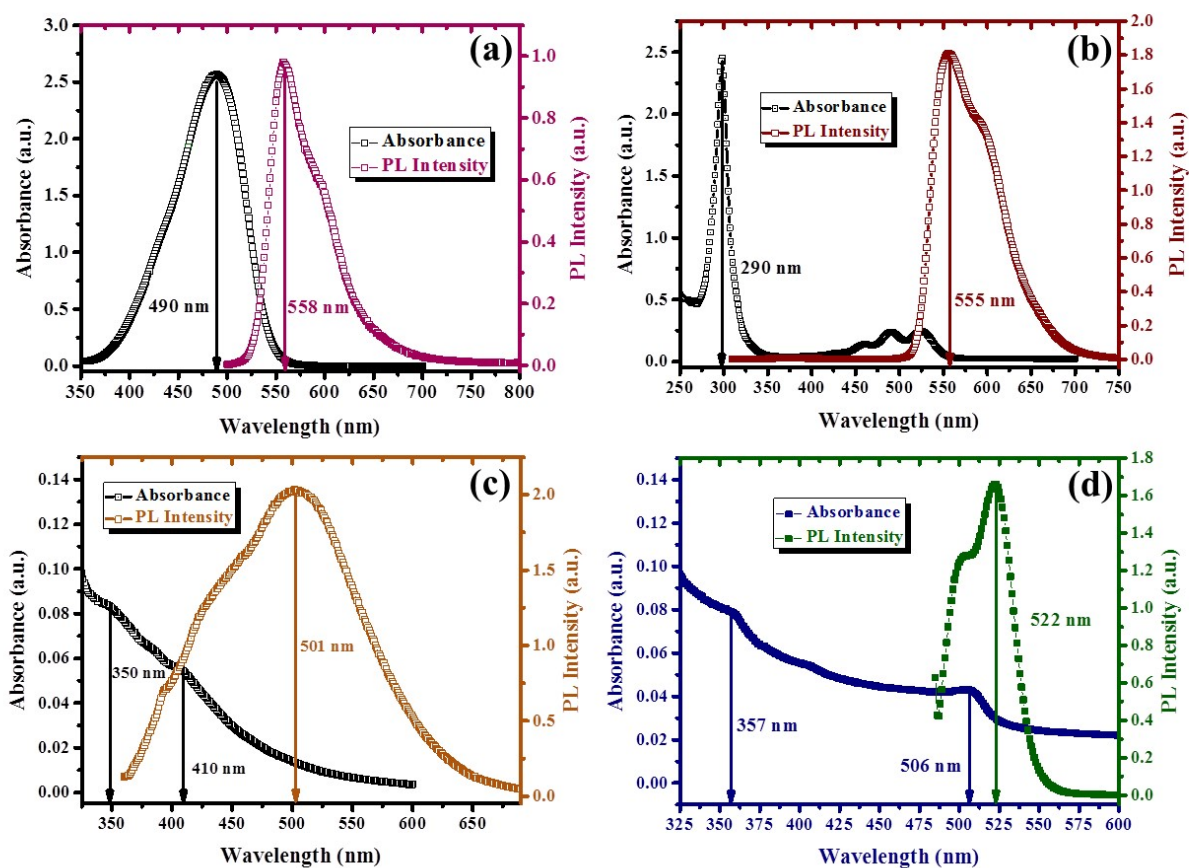

**Figure S3:** Room-temperature absorption and photoluminescence emission spectrum of different organic and inorganic dopants used in the study; (a) MRC dye, (b) rubrene, (c) carbon QDs and (d) perovskite QDs. The dopants have been dispersed in dichloromethane (concentration: 0.01 mg/mL).

## References-

1. M. B. Kanakala and C. V. Yelamaggad, *Journal of Molecular Liquids*, 2021, **332**, 115879.
